# Supplementary material
Source: PubMed Central journal article supplement (PMC3553726)
Supplement: AAC.01668-12_zac999101567so4.pdf [file AAC.01668-12_zac999101567so4.pdf]

1 **Supplementary file of the manuscript entitled: ‘HIV-1 subtype is an independent**  
2 **predictor of reverse transcriptase mutation K65R in HIV-1 patients treated with**  
3 **combination antiretroviral therapy including tenofovir’**

4

5 **Table S1: Pairwise subtype comparisons of K65R prevalence across HIV-1 subtypes**

|                  | <b>Subtype A</b> | <b>Subtype B</b> | <b>Subtype C</b> | <b>Subtype F</b> | <b>Subtype G</b> | <b>CRF 02_AG</b> |
|------------------|------------------|------------------|------------------|------------------|------------------|------------------|
| <b>Subtype A</b> | -                | 0.481            | 0.051            | 1.000            | 0.161            | 0.519            |
| <b>Subtype B</b> | 0.481            | -                | 0.016            | 0.535            | 0.069            | 0.923            |
| <b>Subtype C</b> | 0.051            | 0.016            | -                | 0.089            | 0.346            | 0.195            |
| <b>Subtype F</b> | 1.000            | 0.535            | 0.089            | -                | 0.229            | 0.549            |
| <b>Subtype G</b> | 0.161            | 0.069            | 0.346            | 0.229            | -                | 0.569            |
| <b>CRF 02_AG</b> | 0.519            | 0.923            | 0.195            | 0.549            | 0.569            | -                |

6

7 This matrix shows the p-values for pairwise comparisons of K65R prevalence across subtypes. A chi-  
8 square test was used to compute the p-value based on a two-by-two contingency table of K65R presence  
9 for each pair of subtypes. Compared to the K65R prevalence in subtype B, only subtype C viruses  
10 displayed a significant different prevalence. Please see Table 2 in the manuscript text for the absolute  
11 patient count and the number of K65R cases for each subtype.

12

13 **Table S2: Distribution of K65R prevalence across regression variables**

| <b>Variables</b>                               | <b>Non-K65R</b> | <b>K65R</b> |
|------------------------------------------------|-----------------|-------------|
| Prior exposure to TDF therapy (n)              | 93.3            | 6.7         |
| Prior exposure to ABC or ddl therapy (n)       | 91.9            | 8.1         |
| <b>Second drug in combination with TDF (n)</b> |                 |             |
| ABC                                            | 90.1            | 9.9         |
| ddl                                            | 75.0            | 25.0        |
| AZT                                            | 98.4            | 1.6         |
| d4T                                            | 98.2            | 1.8         |
| 3TC                                            | 89.2            | 10.8        |
| FTC                                            | 95.0            | 5.0         |
| <b>Third drug in combination with TDF (n)</b>  |                 |             |
| Boosted PI                                     | 97.8            | 2.2         |
| Unboosted PI                                   | 96.4            | 3.6         |
| NNRTIs                                         | 78.2            | 21.8        |
| EFV                                            | 81.1            | 18.9        |
| NVP                                            | 72.3            | 27.6        |
| <b>Co-occurrence of RT mutations (n)</b>       |                 |             |
| TAM 1                                          | 99.1            | 0.9         |
| TAM 2                                          | 94.8            | 5.2         |
| NAMs                                           | 66.9            | 33.1        |
| M184V                                          | 81.9            | 18.1        |
| NNRTI mutations                                | 90.1            | 9.9         |

14

15 To illustrate varying K65R selection in our study population, this table shows K65R prevalence for  
 16 discrete variables included in multivariate regression. These findings are in accordance with the factors  
 17 identified by the regression model as significant predictors of K65R selection. Primarily the co-  
 18 administration of didanosine or NNRTIs with tenofovir resulted in high selection of K65R, while the  
 19 co-occurrence of K65R with TAMs is rarely observed. Abbreviations are as follows: ABC - Abacavir,  
 20 ddl - didanosine, AZT - zidovudine, d4T - stavudine, 3TC - lamivudine, FTC - emtricitabine, PI -  
 21 protease inhibitor, NNRTI - non-nucleoside reverse transcriptase inhibitor, EFV - efavirenz, NVP -  
 22 nevirapine. Mutation patterns in RT were defined as thymidine analogue mutations (TAM) 1 (M41L,  
 23 L210W or T215Y), TAM 2 (D67N, K70R, 215F or D219E/Q), M184V, other nucleoside analogue  
 24 mutations (NAMs) (A62V, V75I, F77L, F116Y or Q151M) and non-nucleoside RT inhibitor (NNRTI)  
 25 mutations (L100I, K103N or Y181C).

26

27 **Table S3: Subtype distribution and K65R selection in the study by Gupta et al.**

28

|           | <b>Non-K65R</b> | <b>K65R</b> |
|-----------|-----------------|-------------|
| Subtype A | 48              | 0           |
| Subtype B | 235             | 13          |
| Subtype C | 83              | 10          |

29

30 In the manuscript entitled 'K65R and Y181C are less prevalent in HAART-experienced HIV-1 subtype

31 A patients' published by AIDS in 2005 by Gupta et al. (PMID 16227803), a lower prevalence of K65R

32 in patients infected with subtype A was reported compared to those infected with subtypes B or C. In

33 this table, the number of patients and the number of K65R detected are shown for subtypes A, B and C.

34

35 **Table S4: A re-analysis of the reported subtype association with K65R selection in the study by**  
36 **Gupta et al.**

37

| <b>Comparison of subtype combinations</b> | <b>P-value</b> |
|-------------------------------------------|----------------|
| A ~ B ~ C                                 | 0.022          |
| A ~ B                                     | 0.137          |
| A ~ C                                     | 0.016          |
| B ~ C                                     | 0.089          |
| A ~ (B + C)                               | 0.094          |
| (A + B) ~ C                               | 0.040          |
| B ~ (A+C)                                 | 0.505          |

38

39 Based on the information provided in Table S3, we compared the prevalence of K65R for all the  
40 different subtype combinations possible. The chi-square test of independence was used to compute  
41 statistical significance values, following the methodology used by Gupta et al. These results show that  
42 subtype A viruses do have a lower prevalence of K65R compared to subtype B or to the combined  
43 population of subtype B and subtype C viruses, as stated otherwise in the original manuscript by Gupta  
44 et al. Similar to the findings in our manuscript, subtype C viruses displayed a significant difference in  
45 K65R prevalence compared to subtype B viruses.
